# Supplementary material
Source: Springer Nature journal article supplement (https://www.springermedizin.de/resource/supplementary/12936_2011_1985_MOESM1_ESM.pdf/9542154)

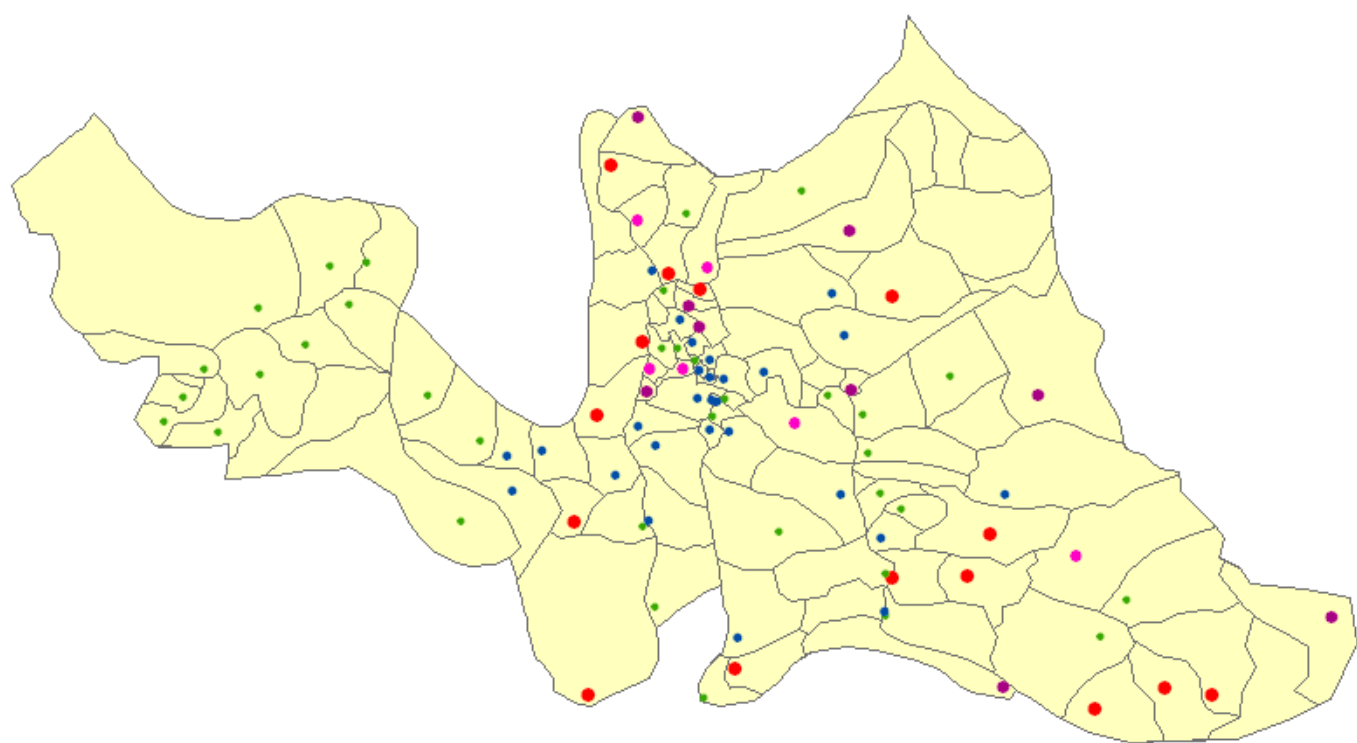

## Legend

### Positive rate

- <5%
- >5 - 15%
- >15 - 20%
- >20 - 30%
- >30%

□ Village boundary

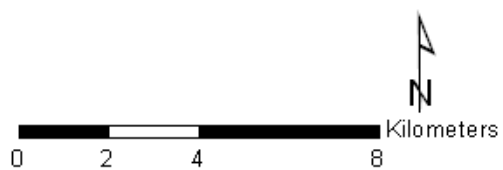

Supplement: MOESM1 [file 9542154]
